# Supplementary material for: Thermoelectric Performance Optimization of n-Type La3−xSmxTe4/Ni Composites via Sm Doping
Source: MDPI journal article supplement (doi:10.3390/en15072353), 2022-03-23
Supplement: s1 [file s1]

## Supplementary materials

### Thermoelectric performance optimization of n-type $\text{La}_{3-x}\text{Sm}_x\text{Te}_4/\text{Ni}$ composites via Sm doping

Jian Li<sup>a,b</sup>, Qingfeng Song<sup>a</sup>, Ruiheng Liu<sup>c</sup>, Hongliang Dong<sup>d</sup>, Qihao Zhang<sup>a,b</sup>, Xun Shi<sup>a</sup>, Shengqiang Bai<sup>a,b,\*</sup> and Lidong Chen<sup>a,b</sup>

*a. State Key Laboratory of High Performance Ceramics and Superfine Microstructure, Shanghai Institute of Ceramics, Chinese Academy of Sciences, Shanghai 200050, China*

*b. Center of Materials Science and Optoelectronics Engineering, University of Chinese Academy of Sciences, Beijing 100049, China*

*c. Institute of Advanced Materials Science and Engineering, Shenzhen Institutes of Advanced Technology, Chinese Academy of Sciences, Shenzhen 518055, China*

*d. Center for High Pressure Science and Technology Advanced Research, Shanghai 201203, China*

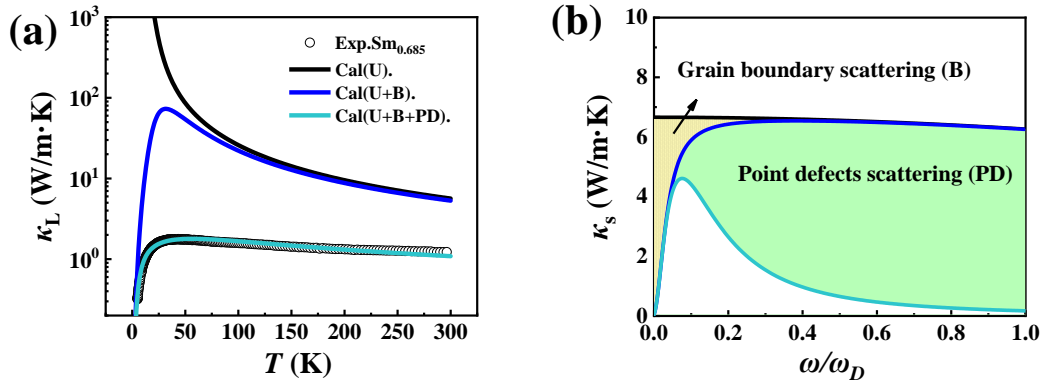

**Figure S1.** (a) Contribution from various phonon scattering mechanisms to  $\kappa_L$  in  $\text{La}_{2.315}\text{Sm}_{0.685}\text{Te}_4/10$  vol.% Ni composite. U, B and PD denote the Umklapp phonon-phonon process, grain boundary scattering and point defect scattering, respectively. (b) Calculated spectral lattice thermal conductivities  $\kappa_s$  for  $\text{La}_{2.315}\text{Sm}_{0.685}\text{Te}_4/10$  vol.% Ni composite at 300 K.

### Debye-Callaway model for fitting low temperature lattice thermal conductivity

According to the Debye-Callaway model, the lattice thermal conductivity with doping or alloying can be calculated with the following equation [1]:

$$\kappa_L = \frac{k_B}{2\pi^2 v_s} \left( \frac{k_B T}{\hbar} \right)^3 \int_0^{\theta_D/T} \tau_{\text{tot}} \frac{z^4 e^z}{(e^z - 1)^2} dz \quad (\text{S1})$$

The integrand item in conjunction with the coefficient of above equation is the spectral lattice thermal conductivity ( $\kappa_s$ ), namely:

$$\kappa_s = \frac{k_B}{2\pi^2 v_s} \left( \frac{k_B T}{\hbar} \right)^3 \tau_{\text{tot}} \frac{z^4 e^z}{(e^z - 1)^2} \quad (\text{S2})$$

where  $k_B$  is the Boltzmann constant,  $v_s$  is average sound speed,  $\hbar$  is the reduced Plank constant,  $\theta_D$  is Debye temperature,  $\tau_{\text{tot}}$  is total relaxation time and  $z = \hbar\omega/k_B T$  ( $\omega$  denotes the phonon frequency) is the reduced phonon frequency.

We consider three phonon scattering mechanisms here, including Umklapp phonon-phonon scattering, grain boundary scattering and point defect scattering, which are given by:

$$\tau_{\text{tot}}^{-1} = \tau_U^{-1} + \tau_B^{-1} + \tau_{PD}^{-1} \quad (\text{S3})$$

Umklapp phonon-phonon scattering [2]:

$$\tau_U^{-1} = \frac{\hbar^2 \gamma^2}{\bar{M} v_s^2 \theta_D} \omega^2 T \exp\left(-\frac{\theta_D}{3T}\right) \quad (\text{S4})$$

Grain boundary scattering:

$$\tau_B^{-1} = \frac{v_s}{G} \quad (\text{S5})$$

Point defect scattering [3-5]:

$$\tau_{PD}^{-1} = \frac{\bar{V} \omega^4}{4\pi v_s^3} \Gamma \quad (\text{S6})$$

where  $\gamma$  is the Gruneisen parameter,  $\theta_D$  is the Debye temperature,  $v_s$  is average sound speed,  $\bar{M}$  is the average atomic mass,  $\bar{V}$  is the average atomic volume,  $\Gamma$  is the disorder scattering parameter,  $G$  is the average grain size. The overall phonon scattering relaxation time is expressed as:

$$\tau_{\text{tot}}^{-1} = \frac{v_s}{G} + A\omega^4 + B\omega^2 T e^{-\frac{\theta_D}{3T}} \quad (\text{S7})$$

where  $A, B$  are the fitting parameters for point defect scattering, Umklapp phonon-phonon scattering, respectively. The fitting results are shown in Table S1.

**Table S1.** Fitting results obtained by Debye-Callaway model.

| Composition                                                              | $\nu_s/G$ ( $10^9$ s <sup>-1</sup> ) | $A$ ( $10^{-41}$ s <sup>3</sup> ) | $B$ ( $10^{-18}$ s K <sup>-1</sup> ) | $R^2$ | $\chi^2$ |
|--------------------------------------------------------------------------|--------------------------------------|-----------------------------------|--------------------------------------|-------|----------|
| La <sub>2.315</sub> Sm <sub>0.685</sub> Te <sub>4</sub> /<br>10 vol.% Ni | 2.425                                | 4.72                              | 6.452                                | 0.99  | 0.05     |

## References

1. Cahill, D. G.; Watson, S. K.; Pohl, R. O., Lower limit to the thermal conductivity of disordered crystals. *Phys Rev B Condens Matter* **1992**, 46, (10), 6131-6140.
2. Callaway, J., Model for Lattice Thermal Conductivity at Low Temperatures. *Physical Review* **1959**, 113, (4), 1046-1051.
3. Callaway, J.; von Baeyer, H. C., Effect of Point Imperfections on Lattice Thermal Conductivity. *Physical Review* **1960**, 120, (4), 1149-1154.
4. Yang, J.; Meisner, G. P.; Chen, L., Strain field fluctuation effects on lattice thermal conductivity of ZrNiSn-based thermoelectric compounds. *Applied Physics Letters* **2004**, 85, (7), 1140-1142.
5. Holland, M. G., Phonon Scattering in Semiconductors From Thermal Conductivity Studies. *Physical Review* **1964**, 134, (2A), A471-A480.
