# Supplementary material for: Thermoelectric Performance Optimization of n-Type La3−xSmxTe4/Ni Composites via Sm Doping
Source: MDPI journal article supplement (doi:10.3390/en15072353), 2022-03-23
Supplement: s1 [file s1]

Archive with 1 entries (1 files):
- energies-1632441-supplementary.pdf
